# Supplementary material
Source: HighWire-hosted journal article supplement (https://genome.cshlp.org/content/suppl/2003/04/04/13.4.589)
Supplement: Takada_supp1-3.zip [file Supplemental Research Rata - legend.doc]

**Supplemental Research Rata.** Detailed genomic organization of the *H2‑M* region. The 951,695 bp sequence spans from the last 50 kb of the *H2‑T* region through the entire *Gabbr1* gene, and the diagram is oriented from centromere (top, left) to telomere (bottom, right). Gene orientation, exons, and repetitive elements are indicated by symbols as explained in the box inserted on the figure. Exons are black for genes with open reading frames, white for pseudogenes and class I gene fragments (fr), and grey where the status was uncertain.
